# Supplementary material
Source: PubMed Central journal article supplement (PMC5002241)
Supplement: NIHMS763671-supplement.pdf [file NIHMS763671-supplement.pdf]

**Table S1.** Multivariable models comparing TIPS vs. serial LVP to predict death by 90 days, stratified by baseline eGFR (A and B) and for all subjects (C).

|                                                          | <b>Odds Ratio</b> | <b>95% CI</b> | <b>P value</b> |
|----------------------------------------------------------|-------------------|---------------|----------------|
| <b>A. Baseline eGFR &lt;60 mL/min/1.73 m<sup>2</sup></b> |                   |               |                |
| TIPS                                                     | 1.30              | [0.62, 2.72]  | 0.5            |
| Serial LVP                                               | [reference]       |               |                |
| Age (per year)                                           | 1.03              | [1.00, 1.07]  | 0.07           |
| Baseline eGFR (per mL/min/1.73 m <sup>2</sup> )          | 0.96              | [0.94, 0.99]  | 0.004          |
| <b>B. Baseline eGFR ≥60 mL/min/1.73 m<sup>2</sup></b>    |                   |               |                |
| TIPS                                                     | 0.56              | [0.22, 1.40]  | 0.2            |
| Serial LVP                                               | [reference]       |               |                |
| Age (per year)                                           | 1.04              | [0.99, 1.08]  | 0.1            |
| Baseline eGFR (per mL/min/1.73 m <sup>2</sup> )          | 1.00              | [0.98, 1.03]  | 0.9            |
| <b>C. All subjects</b>                                   |                   |               |                |
| TIPS                                                     | 0.66              | [0.36, 1.21]  | 0.05           |
| Serial LVP                                               | [reference]       |               |                |
| Age (per year)                                           | 1.03              | [1.00, 1.06]  | 0.03           |
| Baseline eGFR* (per mL/min/1.73 m <sup>2</sup> )         | 1.00              | [0.99, 1.01]  | 0.7            |
| Interaction Term (eGFR + TIPS)                           | 0.97              | [0.96, 0.99]  | 0.01           |

Key: TIPS (transjugular intrahepatic portosystemic shunt), LVP (large volume paracentesis), eGFR (estimated glomerular filtration rate), CI (confidence interval), NASH (non-alcoholic steatohepatitis). Follow-up was measured for 90 days starting from the day of TIPS placement in the TIPS cohort, and from day 0 to day 90 in the LVP cohort.  
 \* Baseline eGFR centered at 60 mL/min/1.73 m<sup>2</sup> for interaction analysis.
